# Supplementary material for: The Glycaemic Index-Food-Frequency Questionnaire: Development and Validation of a Food Frequency Questionnaire Designed to Estimate the Dietary Intake of Glycaemic Index and Glycaemic Load: An Effort by the PREVIEW Consortium
Source: PubMed Central journal article supplement (PMC6356369; doi:10.3390/nu11010013), 2018-12-20
Supplement: nutrients-11-00013-s001.pdf [file nutrients-11-00013-s001.pdf]

**Table S1.** List of food items identified as key factors to assess dietary GI/GL.

| <b>Food group</b>                | <b>Food item</b>                                            |
|----------------------------------|-------------------------------------------------------------|
| <b>Potatoes</b>                  | Potatoes fried                                              |
|                                  | Potatoes sliced frozen unprepared                           |
|                                  | Potatoes without skins boiled                               |
|                                  | French fries                                                |
| <b>Beverages</b>                 |                                                             |
| <i>Alcoholic beverages</i>       | Beer                                                        |
|                                  | Wine (red, white, rose)                                     |
| <i>Sugar-sweetened beverages</i> | Soft drink with and without caffeine                        |
|                                  | Ice tea                                                     |
|                                  | Lemonade squash Dubbelfriss light                           |
|                                  | Fruit drink concentrate (undiluted, diluted)                |
|                                  | Whey drink Taksi with sugar                                 |
|                                  | Juice drink (Dubbelfriss, Vruchtenfris, Tintelfruit, light) |
| <i>Juices</i>                    | Orange juice (fresh, pasteurized)                           |
|                                  | Apple juice                                                 |
|                                  | Fruit juice with >2 fruits                                  |
| <b>Bread</b>                     |                                                             |
| <i>Rusks, crackers</i>           | Crispbakes (plain, wholemeal)                               |
|                                  | Crispbread wholemeal                                        |
|                                  | Toast                                                       |
| <i>Breads</i>                    | Bread brown wheat                                           |
|                                  | Bread wholemeal (with or without seeds)                     |
|                                  | Bread multigrain (with or without seeds)                    |
|                                  | Bread white (water- , milk-based)                           |
|                                  | Roll white (soft, hard)                                     |
|                                  | Roll brown (soft, hard)                                     |
|                                  | Bun currant/raisin                                          |
|                                  | Croissant                                                   |
|                                  | Pita                                                        |
|                                  | Baguette white                                              |
|                                  | Bread crumbs                                                |
|                                  | <b>Fruit</b>                                                |
|                                  | Banana                                                      |
|                                  | Orange                                                      |
|                                  | Grapes                                                      |
|                                  | Melon                                                       |
|                                  | Kiwi fruit                                                  |
|                                  | Apple sauce tinned                                          |
| <b>Cakes and cookies</b>         | Cake spiced Dutch (ontbijtkoek)                             |
|                                  | Cake sponge Dutch (eierkoek)                                |
|                                  | Cupcake iced                                                |
|                                  | Apple pie Dutch                                             |
|                                  | Biscuit (spiced, wholemeal, plain)                          |
|                                  | Biscuit filled (with chocolate, fruit)                      |
|                                  | Children's biscuit average                                  |
|                                  | Chocolate chip cookie                                       |
| <b>Cereals</b>                   | Muesli with fruit                                           |
|                                  | Muesli crunchy (plain, with fruit)                          |

|                                 |                                            |
|---------------------------------|--------------------------------------------|
|                                 | Pasta plain boiled                         |
|                                 | Rice boiled (white, brown)                 |
| <b>Vegetables</b>               | Zucchini                                   |
|                                 | Cucumber                                   |
|                                 | Carrots                                    |
|                                 | Onion                                      |
|                                 | Pea garden                                 |
|                                 | Lettuce iceberg                            |
|                                 | Sweet corn                                 |
|                                 | French beans                               |
|                                 | Sweet pepper green                         |
| <b>Sandwich filling</b>         | Peanut butter (with or without nut pieces) |
|                                 | Chocolate spread (duo, hazelnut)           |
|                                 | Chocolate confetti plain                   |
|                                 | Coloured confetti fruit-flavoured          |
|                                 | Jam                                        |
| <b>Dairy (excluding cheese)</b> | Milk (skimmed, semi-skimmed, whole)        |
|                                 | Buttermilk                                 |
|                                 | Chocolate milk                             |
|                                 | Yogurt (low, half, full fat)               |
|                                 | Yogurt drink (with or without sweeteners)  |
|                                 | Custard (all flavours, full-fat)           |
|                                 | Whipped cream (with or without sugar)      |
|                                 | Ice cream dairy-based                      |
| <b>Nuts, seeds, snacks</b>      | Nuts and seeds                             |
|                                 | Mixed nuts, raisins, and currants          |
|                                 | Crisps potato (flavoured, unflavoured)     |
|                                 | Dough for pizza and savoury pie            |
|                                 | Pancake                                    |
| <b>Sugar and confectionary</b>  | Boiled sweets                              |
|                                 | Wine gums                                  |
|                                 | Liquorice (sweet, salted)                  |
|                                 | Sugar granulated                           |
|                                 | Waffle syrup                               |
|                                 | Ice lolly / sorbet                         |
|                                 | Candybar                                   |
|                                 | Chocolate (white, milk, dark)              |

Note that for the final FFQ, food items were grouped when there was not a large variation between their GI. For example, vegetables largely have the same GI; therefore, we did not assess all types of vegetables separately.

**Supplemental Table 2.** Validation results for the GI-FFQ vs. general-FFQ stratified for sex.

|                          | Men (n=263)      |      |                |          | Women (n=212)    |      |                |          |
|--------------------------|------------------|------|----------------|----------|------------------|------|----------------|----------|
|                          | Absolute intakes |      | similar Q or T | Crude    | Absolute intakes |      | similar Q or T | Crude    |
|                          | mean             | SD   | %              | <i>r</i> | Mean             | SD   | %              | <i>r</i> |
| Energy, kJ/day           | 6315             | 1730 | 46             | 0.51     | 5281             | 1539 | 46             | 0.56     |
| Carbohydrates, g/d       | 231              | 64   | 48             | 0.60     | 193              | 59   | 47             | 0.62     |
| Mono/disaccharides, g/d  | 106              | 40   | 45             | 0.60     | 92               | 37   | 45             | 0.55     |
| Polysaccharides, g/d     | 125              | 36   | 45             | 0.57     | 101              | 31   | 52             | 0.59     |
| Fibres, g/d              | 21               | 6    | 43             | 0.56     | 19               | 5    | 45             | 0.58     |
| Bread, g/d               | 143              | 62   | 53             | 0.71     | 108              | 52   | 56             | 0.67     |
| Breakfast cereals, g/d   | 7.5              | 14   | 64             | 0.45     | 8                | 13   | 58             | 0.36     |
| Potatoes, g/d            | 72               | 43   | 43             | 0.55     | 50               | 29   | 43             | 0.48     |
| Pasta, g/d               | 29               | 23   | 43             | 0.60     | 24               | 19   | 44             | 0.51     |
| Rice, g/d                | 26               | 25   | 45             | 0.43     | 22               | 18   | 45             | 0.47     |
| Vegetables, g/d          | 98               | 73   | 37             | 0.39     | 126              | 66   | 47             | 0.52     |
| Fruit, g/d               | 204              | 126  | 51             | 0.66     | 210              | 127  | 54             | 0.67     |
| Dairy, g/d               | 345              | 225  | 47             | 0.63     | 314              | 189  | 43             | 0.50     |
| Soup, g/d                | 42               | 43   | 36             | 0.45     | 46               | 43   | 37             | 0.46     |
| Coffee, g/d              | 558              | 293  | 50             | 0.72     | 396              | 254  | 47             | 0.82     |
| SSB, g/d                 | 66               | 128  | 59             | 0.52     | 35               | 94   | 56             | 0.41     |
| ASB, g/d                 | 18               | 68   | -              | 0.44     | 32               | 123  | -              | 0.44     |
| Fruit juices, g/d        | 99               | 119  | 52             | 0.64     | 77               | 124  | 50             | 0.52     |
| Alcoholic beverages, g/d | 116              | 167  | 56             | 0.73     | 25               | 90   | 48             | 0.41     |
| Savoury snacks, g/d      | 48               | 44   | 41             | 0.49     | 38               | 35   | 35             | 0.36     |
| Cake/cookies, g/d        | 38               | 29   | 44             | 0.61     | 38               | 27   | 51             | 0.63     |
| Sweets, g/d              | 35               | 27   | 43             | 0.57     | 30               | 28   | 41             | 0.55     |
| GI                       | 55               | 3    | 47             | 0.51     | 53               | 3    | 48             | 0.55     |
| GL                       | 128              | 37   | 45             | 0.58     | 103              | 33   | 41             | 0.62     |

SSB: sugar sweetened beverages; ASB: artificially sweetened beverages; ASB intake data as obtained by the GI-FFQ did not allow cross-classification analyses.
